# Supplementary material for: The long-term outcomes of CIS patients in the Barcelona inception cohort: Looking back to recognize aggressive MS
Source: PubMed Central journal article supplement — Mult Scler. 2019 Oct 15;26(13):1658–69. doi: 10.1177/1352458519877810 (PMC7604549; doi:10.1177/1352458519877810), 2019-10-15
Supplement: MSJ877810_supplementary_table_1.pdf [file MSJ877810_supplementary_table_1.pdf]

Supplementary table 1. Description and comparison of the baseline characteristics of the long-term follow-up cohort (with a complete 10-years follow-up (n=401)) and the cohort with the patients with an incomplete follow-up (N = 161).

| Baseline characteristics                | Long term follow-up cohort (n=401) | Cohort with incomplete follow-up (n=161) | p      |
|-----------------------------------------|------------------------------------|------------------------------------------|--------|
| Females: n (%)                          | 287 (71.6)                         | 110 (68.3)                               | 0.508  |
| Mean (SD) age in years                  | 30.0 (8.1)                         | 30.6 (9.0)                               | 0.463  |
| CIS topography: n (%)                   |                                    |                                          |        |
| ON                                      | 142 (35.4)                         | 69 (42.9)                                | 0.271  |
| BS                                      | 112 (27.9)                         | 46 (28.6)                                |        |
| SC                                      | 110 (27.4)                         | 34 (21.1)                                |        |
| Other                                   | 37 (9.2)                           | 12 (7.45)                                |        |
| +OB: n (%)                              | 221/334 (66.2)                     | 54/113 (47.8)                            | <0.001 |
| Baseline T2 brain lesions: n (%)*       |                                    |                                          | <0.001 |
| 0                                       | 80/391 (20.5)                      | 73/156 (46.8)                            |        |
| 1-3                                     | 67/391 (17.1)                      | 17/156 (10.9)                            |        |
| 4-9                                     | 56/391 (14.3)                      | 18/156 (11.5)                            |        |
| ≥ 10                                    | 188/391 (48.1)                     | 48/156 (30.8)                            |        |
| Gad+: n (%)                             | 97/239 (40.6)                      | 7/63 (11.1)                              | <0.001 |
| Median (IQR) time of follow-up in years | 14.0 (11.9-16.7)                   | 5.13 (2.3-7.6)                           | <0.001 |

Abbreviations: SD: standard deviation; CIS: clinically isolated syndrome; ON: optic nerve; BS: brainstem; SC: spinal cord; OB: oligoclonal bands; Gad: gadolinium; All tests are Fisher's exact and Chi square tests, except for the age (Student's t-test) and the follow-up time (Mann-Whitney test).
