# Supplementary material for: The long-term outcomes of CIS patients in the Barcelona inception cohort: Looking back to recognize aggressive MS
Source: PubMed Central journal article supplement — Mult Scler. 2019 Oct 15;26(13):1658–69. doi: 10.1177/1352458519877810 (PMC7604549; doi:10.1177/1352458519877810), 2019-10-15
Supplement: MSJ877810_supplementary_table_2.pdf [file MSJ877810_supplementary_table_2.pdf]

Supplementary table 2. Baseline clinical and demographic characteristics and outcomes in treated versus not treated patients.

| Baseline characteristics                      | Not treated (n=190) | Treated (n=211)  | p      |
|-----------------------------------------------|---------------------|------------------|--------|
| <b>Females: n (%)</b>                         | 136 (71.6)          | 151 (71.6)       | 1      |
| <b>Mean (SD) age in years</b>                 | 31.6 (8.6)          | 28.5 (7.4)       | <0.001 |
| <b>CIS topography: n (%)</b>                  |                     |                  | 0.040  |
| ON                                            | 81 (42.6)           | 61 (28.9)        |        |
| BS                                            | 46 (24.2)           | 66 (31.3)        |        |
| SC                                            | 47 (24.7)           | 63 (29.9)        |        |
| Other                                         | 16 (8.4)            | 21 (10.0)        |        |
| <b>+OB: n (%)</b>                             | 74/159 (46.5)       | 147/175 (84.0)   | <0.001 |
| <b>Baseline T2 brain lesions: n (%)*</b>      |                     |                  | <0.001 |
| 0                                             | 78/185 (42.2)       | 2/206 (1.0)      |        |
| 1-3                                           | 43/185 (23.2)       | 24/206 (11.7)    |        |
| 4-9                                           | 21/185 (11.4)       | 35/206 (17.0)    |        |
| ≥10                                           | 43/185 (23.2)       | 145/206 (70.4)   |        |
| <b>Gad+: n (%)</b>                            | 16/82 (19.5)        | 81/157 (51.6)    | 0.026  |
| <b>Median(IQR) time of follow-up in years</b> | 14.2 (11.5-17.2)    | 13.9 (12.3-16.3) | 0.982  |

| Outcomes                  | Not treated (n=190) | Treated (n=211) | p      |
|---------------------------|---------------------|-----------------|--------|
| <b>CDMS</b>               | 71 (37.4)           | 196 (92.9)      | <0.001 |
| <b>2005 McDonald MS</b>   | 87 (45.8)           | 199 (94.3)      | <0.001 |
| <b>2017 McDonald MS</b>   | 36/71 (50.7)        | 109/112 (97.3)  | <0.001 |
| <b>Confirmed EDSS 3.0</b> | 11 (5.8)            | 85 (40.3)       | <0.001 |
| <b>Confirmed EDSS 6.0</b> | 1 (0.5)             | 15 (7.1)        | 0.001  |

Abbreviations: SD: standard deviation; CIS: clinically isolated syndrome; ON: optic nerve; BS: brainstem; SC: spinal cord; OB: oligoclonal bands; Gad: gadolinium; CDMS: clinical definite multiple sclerosis; MS: multiple sclerosis; EDSS: expanded disability status scale. IQR: interquartile range.

All tests are Fisher's exact and Chi square tests, except for the age (Student's t-test) and the follow-up time (Mann-Whitney test).
